# Supplementary material for: Spatio-temporal distribution of ostracod species in saline inland lakes (Mansfeld lake area; Central Germany)
Source: PeerJ. 2022 Aug 9;10:e13668. doi: 10.7717/peerj.13668 (PMC9373980; doi:10.7717/peerj.13668)
Supplement: Supplemental Information 2 — R-values are on the lower side, p-values are on the upper side. Cond, conductivity; do, dissolved oxygen; temp, temperature and pH. Cc, Candona candida; Cn, Candona neglecta; Ct, Cyprideis torosa; Cv, Cypridopsis vidua; Ds, Darwinula stevensoni; Fh, Fabaeformiscandonda holzkampfi; Hs, Heterocypris salina; Ib, Ilyocypris bradyi; Li, Limnocythere inopinata; Pk, Physocypria kraepelini; Pa, Potamocypris arcuata; Psm, Pseudocandona marchica; Sa, Sarscypridopsis. [file peerj-10-13668-s002.xlsx]

## Sheet: Tabelle1
Spearmans rank correlation	cond.	do	temp	pH	CC	CN	CT	CV	DS	FH	HS	IB	LI	PK	PA	PsM	SA
cond.		0.37861	0.82256	0.43124	0.6106	0.42428	0.73066	0.13713	0.54614	0.14773	0.033471	0.35897	0.6045	0.90433	0.86349	0.57212	0.017503
do	0.22808		0.79703	4.1479e-05	0.35581	0.92998	0.65942	0.21299	0.020677	0.62911	0.77735	0.53623	0.42506	0.081169	0.44037	0.023761	0.61655
temp	-0.058824	-0.067443		0.88805	0.10193	0.61429	0.68068	0.76702	0.85409	0.21804	0.86712	0.72962	0.02837	0.087111	0.87145	0.39846	0.91058
pH	0.20444	0.82749	-0.036946		0.054805	0.68116	0.10709	0.40669	0.017103	0.885	0.87682	0.31107	0.54987	0.13841	0.073191	0.14048	0.43943
CC	0.13309	0.23888	0.41024	0.47362		0.078098	0.23611	0.78708	0.085456	0.82879	0.98133	0.63211	0.12885	0.72225	0.22051	0.83803	0.86888
CN	0.20747	0.023066	-0.13173	-0.10756	-0.43875		0.61094	0.48093	0.087744	0.32818	0.0018807	0.75696	0.41766	0.11859	0.31296	0.53599	0.012355
CT	0.090191	0.11531	-0.10773	0.40472	0.30363	0.13296		0.20369	0.71383	0.87738	0.1316	0.90642	0.86863	0.37425	0.01573	0.21614	0.076637
CV	-0.37579	-0.31837	-0.077664	-0.21526	0.070823	-0.18346	0.32458		0.54049	0.22181	0.42407	0.8474	0.4752	0.29246	0.21864	0.29666	0.14044
DS	-0.15746	0.55526	0.048254	0.56914	0.42935	-0.42654	0.09605	-0.15965		0.98259	0.054096	0.94818	0.92488	0.98194	0.044731	0.28983	0.23315
FH	0.36665	-0.12629	-0.31506	0.037957	0.056727	-0.25251	-0.040491	0.31263	0.0057274		0.14589	0.20937	0.10496	0.011747	0.38865	0.25631	0.4142
HS	0.51726	0.074135	0.043905	0.040675	0.0061444	0.69684	0.38076	-0.20756	-0.47484	-0.36821		0.61535	0.71662	0.071385	0.58109	0.59536	0.00067389
IB	0.23736	0.16131	-0.090554	0.26128	0.12519	0.081113	0.030854	-0.050488	0.01706	0.32076	0.13134		0.44022	0.81608	0.085461	0.91478	0.77698
LI	-0.13535	0.20713	0.53077	0.15602	0.38329	-0.21038	-0.043403	-0.18582	-0.024749	-0.40698	0.095079	0.20056		0.031727	0.78409	0.24532	0.5983
PK	0.031547	-0.43475	-0.42731	-0.37467	-0.093114	-0.39304	-0.23012	0.27116	0.0059433	0.59502	-0.44791	0.061006	-0.52169		0.45175	0.067358	0.19602
PA	-0.045116	0.20049	-0.042462	0.44539	0.31346	-0.2603	0.57509	0.31467	0.49223	0.22344	-0.1441	0.42934	-0.071839	0.19563		0.64588	0.58763
PsM	-0.1475	0.54471	0.21897	0.37286	0.053627	-0.16141	-0.3163	-0.26889	0.27258	-0.29149	-0.13875	-0.02809	0.29801	-0.45371	-0.12019		0.25631
SA	0.56748	0.1309	-0.02948	0.2009	-0.043319	0.59166	0.44069	-0.37289	-0.30546	-0.21191	0.74054	-0.074261	-0.13765	-0.32985	-0.14164	-0.29149
