# Supplementary material for: Spatio-temporal distribution of ostracod species in saline inland lakes (Mansfeld lake area; Central Germany)
Source: PeerJ. 2022 Aug 9;10:e13668. doi: 10.7717/peerj.13668 (PMC9373980; doi:10.7717/peerj.13668)
Supplement: Supplemental Information 3 — Abbreviations of the water bodies: KS, Kernersee; BS, Bindersee; TE, Teufe; TE2, Teufe2; QW, Quelle im Wald; OT, Ottilienteich; OT2, Ottilienteich2; WL, Wannsleben; TA, Tongrube Alte Schule; ST, Salzatal; SS, Süßer See; MG, Mittelgraben. [file peerj-10-13668-s003.xlsx]

## Sheet: 4.19
KS		absolute biocoenosis	relative biocoenosis		BS		abs. bio	rel. bio		TE		abs. bio	rel. bio		TE2		abs. bio	rel. bio		QW		abs. bio	rel. bio		OT		abs. bio	rel. bio		OT2		abs. bio	rel. bio		WL		abs. bio	rel. bio		TS		abs. bio	rel. bio		ST		abs. bio	rel. bio
C.candida	adult	1	0.45045		C.candida	a	0	0		C.candida	a	0	0		C.candida	a	no species found			C.candida	a	no species found			C.candida	a	0	0		C.candida	a	0	0		C.candida	a	0	0		C.candida	a	0	0		C.candida	a	0	0
	juvenile	0	0			j	0	0			j	0	0			j					j					j	0	0			j	0	0			j	0	0			j	0	0			j	0	0
C. neglecta	a	0	0		C. neglecta	a	22	59.4595		C. neglecta	a	7	3.0303		C. neglecta	a				C. neglecta	a				C. neglecta	a	0	0		C. neglecta	a	0	0		C. neglecta	a	1	0.125945		C. neglecta	a	0	0		C. neglecta	a	0	0
	j	0	0			j	0	0			j	0	0			j					j					j	0	0			j	0	0			j	4	0.503778			j	0	0			j	0	0
C. kingsleii	a	0	0		C. kingsleii	a	0	0		C. kingsleii	a	0	0		C. kingsleii	a				C. kingsleii	a				C. kingsleii	a	0	0		C. kingsleii	a	0	0		C. kingsleii	a	0	0		C. kingsleii	a	0	0		C. kingsleii	a	0	0
	j	0	0			j	0	0			j	0	0			j					j					j	0	0			j	0	0			j	0	0			j	0	0			j	0	0
C. torosa	a	62	27.9279		C. torosa	a	9	24.3243		C. torosa	a	68	29.4372		C. torosa	a				C. torosa	a				C. torosa	a	0	0		C. torosa	a	0	0		C. torosa	a	0	0		C. torosa	a	0	0		C. torosa	a	0	0
	j	3	1.35135			j	0	0			j	46	19.9134			j					j					j	0	0			j	0	0			j	0	0			j	0	0			j	1	0.21322
C. fuscata	a	0	0		C. fuscata	a	0	0		C. fuscata	a	0	0		C. fuscata	a				C. fuscata	a				C. fuscata	a	0	0		C. fuscata	a	0	0		C. fuscata	a	0	0		C. fuscata	a	0	0		C. fuscata	a	0	0
	j	0	0			j	0	0			j	0	0			j					j					j	0	0			j	0	0			j	0	0			j	0	0			j	0	0
C. vidua	a	8	3.6036		C. vidua	a	0	0		C. vidua	a	0	0		C. vidua	a				C. vidua	a				C. vidua	a	44	52.381		C. vidua	a	22	3.92857		C. vidua	a	1	0.125945		C. vidua	a	0	0		C. vidua	a	0	0
	j	0	0			j	0	0			j	0	0			j					j					j	5	5.95238			j	11	1.96429			j	0	0			j	0	0			j	0	0
D. stevensoni	a	75	33.7838		D. stevensoni	a	0	0		D. stevensoni	a	1	0.4329		D. stevensoni	a				D. stevensoni	a				D. stevensoni	a	0	0		D. stevensoni	a	0	0		D. stevensoni	a	0	0		D. stevensoni	a	48	29.8137		D. stevensoni	a	2	0.426439
	j	3	1.35135			j	0	0			j	0	0			j					j					j	1	1.19048			j	0	0			j	0	0			j	33	20.4969			j	2	0.426439
E. virens	a	0	0		E. virens	a	0	0		E. virens	a	0	0		E. virens	a				E. virens	a				E. virens	a	0	0		E. virens	a	0	0		E. virens	a	0	0		E. virens	a	0	0		E. virens	a	0	0
	j	0	0			j	0	0			j	0	0			j					j					j	0	0			j	0	0			j	0	0			j	0	0			j	0	0
F. fabaeformis	a	0	0		F. fabaeformis	a	0	0		F. fabaeformis	a	0	0		F. fabaeformis	a				F. fabaeformis	a				F. fabaeformis	a	0	0		F. fabaeformis	a	0	0		F. fabaeformis	a	0	0		F. fabaeformis	a	0	0		F. fabaeformis	a	2	0.426439
	j	0	0			j	0	0			j	0	0			j					j					j	0	0			j	0	0			j	0	0			j	0	0			j	12	2.55864
F. holzkampfi	a	9	4.05405		F. holzkampfi	a	0	0		F. holzkampfi	a	0	0		F. holzkampfi	a				F. holzkampfi	a				F. holzkampfi	a	0	0		F. holzkampfi	a	49	8.75		F. holzkampfi	a	0	0		F. holzkampfi	a	0	0		F. holzkampfi	a	0	0
	j	0	0			j	0	0			j	0	0			j					j					j	0	0			j	0	0			j	0	0			j	0	0			j	0	0
Herpetocypris sp?	a	0	0		Herpetocypris sp?	a	0	0		Herpetocypris sp?	a	0	0		Herpetocypris sp?	a				Herpetocypris sp?	a				Herpetocypris sp?	a	0	0		Herpetocypris sp?	a	0	0		Herpetocypris sp?	a	0	0		Herpetocypris sp?	a	0	0		Herpetocypris sp?	a	0	0
	j	0	0			j	0	0			j	0	0			j					j					j	0	0			j	0	0			j	0	0			j	0	0			j	0	0
H. incongruens	a	0	0		H. incongruens	a	0	0		H. incongruens	a	0	0		H. incongruens	a				H. incongruens	a				H. incongruens	a	0	0		H. incongruens	a	0	0		H. incongruens	a	0	0		H. incongruens	a	0	0		H. incongruens	a	0	0
	j	0	0			j	0	0			j	0	0			j					j					j	0	0			j	0	0			j	0	0			j	0	0			j	0	0
H. salina	a	0	0		H. salina	a	5	13.5135		H. salina	a	2	0.865801		H. salina	a				H. salina	a				H. salina	a	0	0		H. salina	a	0	0		H. salina	a	1	0.125945		H. salina	a	0	0		H. salina	a	0	0
	j	0	0			j	1	2.7027			j	61	26.4069			j					j					j	0	0			j	0	0			j	0	0			j	0	0			j	0	0
I. bradyi	a	7	3.15315		I. bradyi	a	0	0		I. bradyi	a	1	0.4329		I. bradyi	a				I. bradyi	a				I. bradyi	a	0	0		I. bradyi	a	0	0		I. bradyi	a	20	2.51889		I. bradyi	a	0	0		I. bradyi	a	0	0
	j	0	0			j	0	0			j	0	0			j					j					j	0	0			j	0	0			j	21	2.64484			j	0	0			j	0	0
I. gibba	a	0	0		I. gibba	a	0	0		I. gibba	a	0	0		I. gibba	a				I. gibba	a				I. gibba	a	0	0		I. gibba	a	0	0		I. gibba	a	0	0		I. gibba	a	0	0		I. gibba	a	0	0
	j	0	0			j	0	0			j	0	0			j					j					j	0	0			j	0	0			j	0	0			j	0	0			j	0	0
I. monstrifica	a	0	0		I. monstrifica	a	0	0		I. monstrifica	a	0	0		I. monstrifica	a				I. monstrifica	a				I. monstrifica	a	0	0		I. monstrifica	a	0	0		I. monstrifica	a	0	0		I. monstrifica	a	0	0		I. monstrifica	a	0	0
	j	0	0			j	0	0			j	0	0			j					j					j	0	0			j	0	0			j	0	0			j	0	0			j	0	0
L. inopinata	a	0	0		L. inopinata	a	0	0		L. inopinata	a	0	0		L. inopinata	a				L. inopinata	a				L. inopinata	a	0	0		L. inopinata	a	0	0		L. inopinata	a	746	93.9547		L. inopinata	a	3	1.86335		L. inopinata	a	0	0
	j	0	0			j	0	0			j	0	0			j					j					j	0	0			j	0	0			j	0	0			j	0	0			j	0	0
N. monacha	a	0	0		N. monacha	a	0	0		N. monacha	a	0	0		N. monacha	a				N. monacha	a				N. monacha	a	0	0		N. monacha	a	0	0		N. monacha	a	0	0		N. monacha	a	0	0		N. monacha	a	0	0
	j	0	0			j	0	0			j	0	0			j					j					j	0	0			j	0	0			j	0	0			j	0	0			j	0	0
P. kraepelini	a	52	23.4234		P. kraepelini	a	0	0		P. kraepelini	a	0	0		P. kraepelini	a				P. kraepelini	a				P. kraepelini	a	34	40.4762		P. kraepelini	a	457	81.6071		P. kraepelini	a	0	0		P. kraepelini	a	0	0		P. kraepelini	a	422	89.9787
	j	0	0			j	0	0			j	0	0			j					j					j	0	0			j	21	3.75			j	0	0			j	0	0			j	27	5.75693
P. newtoni	a	0	0		P. newtoni	a	0	0		P. newtoni	a	0	0		P. newtoni	a				P. newtoni	a				P. newtoni	a	0	0		P. newtoni	a	0	0		P. newtoni	a	0	0		P. newtoni	a	0	0		P. newtoni	a	0	0
	j	0	0			j	0	0			j	0	0			j					j					j	0	0			j	0	0			j	0	0			j	0	0			j	0	0
P. arcuata	a	2	0.900901		P. arcuata	a	0	0		P. arcuata	a	2	0.865801		P. arcuata	a				P. arcuata	a				P. arcuata	a	0	0		P. arcuata	a	0	0		P. arcuata	a	0	0		P. arcuata	a	0	0		P. arcuata	a	1	0.21322
	j	0	0			j	0	0			j	0	0			j					j					j	0	0			j	0	0			j	0	0			j	0	0			j	0	0
P. smaragdina	a	0	0		P. smaragdina	a	0	0		P. smaragdina	a	0	0		P. smaragdina	a				P. smaragdina	a				P. smaragdina	a	0	0		P. smaragdina	a	0	0		P. smaragdina	a	0	0		P. smaragdina	a	0	0		P. smaragdina	a	0	0
	j	0	0			j	0	0			j	0	0			j					j					j	0	0			j	0	0			j	0	0			j	0	0			j	0	0
P. zenkeri	a	0	0		P. zenkeri	a	0	0		P. zenkeri	a	0	0		P. zenkeri	a				P. zenkeri	a				P. zenkeri	a	0	0		P. zenkeri	a	0	0		P. zenkeri	a	0	0		P. zenkeri	a	0	0		P. zenkeri	a	0	0
	j	0	0			j	0	0			j	0	0			j					j					j	0	0			j	0	0			j	0	0			j	0	0			j	0	0
P. compressa	a	0	0		P. compressa	a	0	0		P. compressa	a	0	0		P. compressa	a				P. compressa	a				P. compressa	a	0	0		P. compressa	a	0	0		P. compressa	a	0	0		P. compressa	a	0	0		P. compressa	a	0	0
	j	0	0			j	0	0			j	0	0			j					j					j	0	0			j	0	0			j	0	0			j	0	0			j	0	0
P. marchica	a	0	0		P. marchica	a	0	0		P. marchica	a	0	0		P. marchica	a				P. marchica	a				P. marchica	a	0	0		P. marchica	a	0	0		P. marchica	a	0	0		P. marchica	a	36	22.3602		P. marchica	a	0	0
	j	0	0			j	0	0			j	0	0			j					j					j	0	0			j	0	0			j	0	0			j	41	25.4658			j	0	0
S. aculeata	a	0	0		S. aculeata	a	0	0		S. aculeata	a	43	18.6147		S. aculeata	a				S. aculeata	a				S. aculeata	a	0	0		S. aculeata	a	0	0		S. aculeata	a	0	0		S. aculeata	a	0	0		S. aculeata	a	0	0
	j	0	0			j	0	0			j	0	0			j					j					j	0	0			j	0	0			j	0	0			j	0	0			j	0	0
total		222					37					231															84					560					794					161					469

## Sheet: 6.19
KS		absolute biocoenosis	relative biocoenosis		BS		abs. bio	rel. bio		TE		abs. bio	rel. bio		TE2		abs. bio	rel. bio		QW		abs. bio	rel. bio		OT		abs. bio	rel. bio		OT2		abs. bio	rel. bio		WL		abs. bio	rel. bio		TS		abs. bio	rel. bio		ST		abs. bio	rel. bio
C.candida	a	0	0		C.candida	a	1	0.160772		C.candida	a	0	0		C.candida	a	no sample			C.candida	a	0	0		C.candida	a	0	0		C.candida	a	0	0		C.candida	a	0	0		C.candida	a	0	0		C.candida	a	0	0
	j	7	1.43443			j	39	6.2701			j	0	0			j					j	0	0			j	0	0			j	0	0			j	0	0			j	60	20.202			j	0	0
C. neglecta	a	0	0		C. neglecta	a	1	0.160772		C. neglecta	a	8	6.89655		C. neglecta	a				C. neglecta	a	0	0		C. neglecta	a	0	0		C. neglecta	a	0	0		C. neglecta	a	0	0		C. neglecta	a	0	0		C. neglecta	a	0	0
	j	0	0			j	0	0			j	23	19.8276			j					j	0	0			j	0	0			j	0	0			j	0	0			j	0	0			j	0	0
C. kingsleii	a	0	0		C. kingsleii	a	0	0		C. kingsleii	a	0	0		C. kingsleii	a				C. kingsleii	a	0	0		C. kingsleii	a	0	0		C. kingsleii	a	0	0		C. kingsleii	a	0	0		C. kingsleii	a	0	0		C. kingsleii	a	0	0
	j	0	0			j	0	0			j	0	0			j					j	0	0			j	0	0			j	0	0			j	0	0			j	0	0			j	0	0
C. torosa	a	37	7.58197		C. torosa	a	13	2.09003		C. torosa	a	6	5.17241		C. torosa	a				C. torosa	a	0	0		C. torosa	a	0	0		C. torosa	a	0	0		C. torosa	a	0	0		C. torosa	a	0	0		C. torosa	a	0	0
	j	1	0.204918			j	2	0.321543			j	1	0.862069			j					j	0	0			j	0	0			j	0	0			j	0	0			j	0	0			j	0	0
C. fuscata	a	0	0		C. fuscata	a	0	0		C. fuscata	a	0	0		C. fuscata	a				C. fuscata	a	0	0		C. fuscata	a	0	0		C. fuscata	a	0	0		C. fuscata	a	0	0		C. fuscata	a	0	0		C. fuscata	a	0	0
	j	0	0			j	0	0			j	0	0			j					j	0	0			j	0	0			j	0	0			j	0	0			j	0	0			j	0	0
C. vidua	a	0	0		C. vidua	a	1	0.160772		C. vidua	a	0	0		C. vidua	a				C. vidua	a	0	0		C. vidua	a	10	35.7143		C. vidua	a	2	4.44444		C. vidua	a	0	0		C. vidua	a	0	0		C. vidua	a	0	0
	j	0	0			j	0	0			j	0	0			j					j	0	0			j	0	0			j	0	0			j	0	0			j	0	0			j	0	0
D. stevensoni	a	29	5.94262		D. stevensoni	a	0	0		D. stevensoni	a	0	0		D. stevensoni	a				D. stevensoni	a	0	0		D. stevensoni	a	0	0		D. stevensoni	a	0	0		D. stevensoni	a	2	0.20202		D. stevensoni	a	137	46.1279		D. stevensoni	a	0	0
	j	0	0			j	0	0			j	0	0			j					j	0	0			j	0	0			j	0	0			j	2	0.20202			j	73	24.5791			j	0	0
E. virens	a	0	0		E. virens	a	0	0		E. virens	a	0	0		E. virens	a				E. virens	a	0	0		E. virens	a	0	0		E. virens	a	0	0		E. virens	a	0	0		E. virens	a	0	0		E. virens	a	0	0
	j	0	0			j	0	0			j	0	0			j					j	0	0			j	0	0			j	0	0			j	0	0			j	0	0			j	0	0
F. fabaeformis	a	0	0		F. fabaeformis	a	0	0		F. fabaeformis	a	0	0		F. fabaeformis	a				F. fabaeformis	a	0	0		F. fabaeformis	a	0	0		F. fabaeformis	a	0	0		F. fabaeformis	a	0	0		F. fabaeformis	a	0	0		F. fabaeformis	a	1	8.33333
	j	0	0			j	0	0			j	0	0			j					j	0	0			j	0	0			j	0	0			j	0	0			j	0	0			j	1	8.33333
F. holzkampfi	a	5	1.02459		F. holzkampfi	a	0	0		F. holzkampfi	a	0	0		F. holzkampfi	a				F. holzkampfi	a	0	0		F. holzkampfi	a	0	0		F. holzkampfi	a	1	2.22222		F. holzkampfi	a	0	0		F. holzkampfi	a	0	0		F. holzkampfi	a	0	0
	j	4	0.819672			j	0	0			j	0	0			j					j	0	0			j	0	0			j	1	2.22222			j	0	0			j	0	0			j	0	0
Herpetocypris sp?	a	0	0		Herpetocypris sp?	a	0	0		Herpetocypris sp?	a	0	0		Herpetocypris sp?	a				Herpetocypris sp?	a	0	0		Herpetocypris sp?	a	0	0		Herpetocypris sp?	a	0	0		Herpetocypris sp?	a	0	0		Herpetocypris sp?	a	0	0		Herpetocypris sp?	a	0	0
	j	0	0			j	0	0			j	0	0			j					j	0	0			j	0	0			j	0	0			j	0	0			j	0	0			j	0	0
H. incongruens	a	0	0		H. incongruens	a	0	0		H. incongruens	a	0	0		H. incongruens	a				H. incongruens	a	2	15.3846		H. incongruens	a	0	0		H. incongruens	a	0	0		H. incongruens	a	0	0		H. incongruens	a	0	0		H. incongruens	a	0	0
	j	0	0			j	0	0			j	0	0			j					j	0	0			j	0	0			j	0	0			j	0	0			j	0	0			j	0	0
H. salina	a	0	0		H. salina	a	13	2.09003		H. salina	a	12	10.3448		H. salina	a				H. salina	a	1	7.69231		H. salina	a	12	42.8571		H. salina	a	0	0		H. salina	a	0	0		H. salina	a	0	0		H. salina	a	0	0
	j	0	0			j	12	1.92926			j	50	43.1034			j					j	5	38.4615			j	0	0			j	0	0			j	0	0			j	0	0			j	0	0
I. bradyi	a	13	2.66393		I. bradyi	a	1	0.160772		I. bradyi	a	0	0		I. bradyi	a				I. bradyi	a	0	0		I. bradyi	a	0	0		I. bradyi	a	0	0		I. bradyi	a	3	0.30303		I. bradyi	a	0	0		I. bradyi	a	0	0
	j	15	3.07377			j	3	0.482315			j	0	0			j					j	0	0			j	0	0			j	0	0			j	0	0			j	0	0			j	0	0
I. gibba	a	0	0		I. gibba	a	0	0		I. gibba	a	0	0		I. gibba	a				I. gibba	a	4	30.7692		I. gibba	a	0	0		I. gibba	a	0	0		I. gibba	a	0	0		I. gibba	a	0	0		I. gibba	a	0	0
	j	0	0			j	0	0			j	0	0			j					j	1	7.69231			j	0	0			j	0	0			j	0	0			j	0	0			j	0	0
I. monstrifica	a	23	4.71311		I. monstrifica	a	0	0		I. monstrifica	a	0	0		I. monstrifica	a				I. monstrifica	a	0	0		I. monstrifica	a	0	0		I. monstrifica	a	0	0		I. monstrifica	a	0	0		I. monstrifica	a	0	0		I. monstrifica	a	0	0
	j	8	1.63934			j	0	0			j	0	0			j					j	0	0			j	0	0			j	0	0			j	0	0			j	0	0			j	0	0
L. inopinata	a	3	0.614754		L. inopinata	a	504	81.0289		L. inopinata	a	0	0		L. inopinata	a				L. inopinata	a	0	0		L. inopinata	a	0	0		L. inopinata	a	0	0		L. inopinata	a	927	93.6364		L. inopinata	a	0	0		L. inopinata	a	0	0
	j	0	0			j	28	4.50161			j	0	0			j					j	0	0			j	0	0			j	0	0			j	54	5.45455			j	0	0			j	0	0
N. monacha	a	0	0		N. monacha	a	0	0		N. monacha	a	0	0		N. monacha	a				N. monacha	a	0	0		N. monacha	a	0	0		N. monacha	a	0	0		N. monacha	a	0	0		N. monacha	a	0	0		N. monacha	a	0	0
	j	0	0			j	0	0			j	0	0			j					j	0	0			j	0	0			j	0	0			j	1	0.10101			j	0	0			j	0	0
P. kraepelini	a	178	36.4754		P. kraepelini	a	0	0		P. kraepelini	a	0	0		P. kraepelini	a				P. kraepelini	a	0	0		P. kraepelini	a	4	14.2857		P. kraepelini	a	38	84.4444		P. kraepelini	a	1	0.10101		P. kraepelini	a	0	0		P. kraepelini	a	6	50
	j	0	0			j	0	0			j	0	0			j					j	0	0			j	0	0			j	3	6.66667			j	0	0			j	0	0			j	4	33.3333
P. newtoni	a	0	0		P. newtoni	a	0	0		P. newtoni	a	0	0		P. newtoni	a				P. newtoni	a	0	0		P. newtoni	a	0	0		P. newtoni	a	0	0		P. newtoni	a	0	0		P. newtoni	a	0	0		P. newtoni	a	0	0
	j	0	0			j	0	0			j	0	0			j					j	0	0			j	0	0			j	0	0			j	0	0			j	0	0			j	0	0
P. arcuata	a	144	29.5082		P. arcuata	a	3	0.482315		P. arcuata	a	0	0		P. arcuata	a				P. arcuata	a	0	0		P. arcuata	a	0	0		P. arcuata	a	0	0		P. arcuata	a	0	0		P. arcuata	a	0	0		P. arcuata	a	0	0
	j	21	4.30328			j	0	0			j	0	0			j					j	0	0			j	0	0			j	0	0			j	0	0			j	0	0			j	0	0
P. smaragdina	a	0	0		P. smaragdina	a	0	0		P. smaragdina	a	0	0		P. smaragdina	a				P. smaragdina	a	0	0		P. smaragdina	a	2	7.14286		P. smaragdina	a	0	0		P. smaragdina	a	0	0		P. smaragdina	a	0	0		P. smaragdina	a	0	0
	j	0	0			j	0	0			j	0	0			j					j	0	0			j	0	0			j	0	0			j	0	0			j	0	0			j	0	0
P. zenkeri	a	0	0		P. zenkeri	a	0	0		P. zenkeri	a	0	0		P. zenkeri	a				P. zenkeri	a	0	0		P. zenkeri	a	0	0		P. zenkeri	a	0	0		P. zenkeri	a	0	0		P. zenkeri	a	0	0		P. zenkeri	a	0	0
	j	0	0			j	0	0			j	0	0			j					j	0	0			j	0	0			j	0	0			j	0	0			j	0	0			j	0	0
P. compressa	a	0	0		P. compressa	a	0	0		P. compressa	a	0	0		P. compressa	a				P. compressa	a	0	0		P. compressa	a	0	0		P. compressa	a	0	0		P. compressa	a	0	0		P. compressa	a	0	0		P. compressa	a	0	0
	j	0	0			j	1	0.160772			j	0	0			j					j	0	0			j	0	0			j	0	0			j	0	0			j	0	0			j	0	0
P. marchica	a	0	0		P. marchica	a	0	0		P. marchica	a	0	0		P. marchica	a				P. marchica	a	0	0		P. marchica	a	0	0		P. marchica	a	0	0		P. marchica	a	0	0		P. marchica	a	27	9.09091		P. marchica	a	0	0
	j	0	0			j	0	0			j	0	0			j					j	0	0			j	0	0			j	0	0			j	0	0			j	0	0			j	0	0
S. aculeata	a	0	0		S. aculeata	a	0	0		S. aculeata	a	16	13.7931		S. aculeata	a				S. aculeata	a	0	0		S. aculeata	a	0	0		S. aculeata	a	0	0		S. aculeata	a	0	0		S. aculeata	a	0	0		S. aculeata	a	0	0
	j	0	0			j	0	0			j	0	0			j					j	0	0			j	0	0			j	0	0			j	0	0			j	0	0			j	0	0
total		488					622					116										13					28					45					990					297					12
[truncated: 4 more columns]

## Sheet: 9.19
KS		absolute biocoenosis	relative biocoenosis		BS		abs. bio	rel. bio		TE		abs. bio	rel. bio		TE2		abs. bio	rel. bio		QW		abs. bio	rel. bio		OT		abs. bio	rel. bio		OT2		abs. bio	rel. bio		WL		abs. bio	rel. bio		TS		abs. bio	rel. bio		ST		abs. bio	rel. bio
C.candida	a	0	0		C.candida	a	0	0		C.candida	a		0		C.candida	a	no sample			C.candida	a	no species found			C.candida	a	0	0		C.candida	a	0	0		C.candida	a	0	0		C.candida	a	0	0		C.candida	a	no sample
	j	5	1.66667			j	23	3.14637			j	10	52.6316			j					j					j	0	0			j	0	0			j	0	0			j	0	0			j
C. neglecta	a	0	0		C. neglecta	a		0		C. neglecta	a		0		C. neglecta	a				C. neglecta	a				C. neglecta	a	0	0		C. neglecta	a	0	0		C. neglecta	a	0	0		C. neglecta	a	0	0		C. neglecta	a
	j	0	0			j		0			j		0			j					j					j	0	0			j	0	0			j	0	0			j	0	0			j
C. kingsleii	a	0	0		C. kingsleii	a		0		C. kingsleii	a		0		C. kingsleii	a				C. kingsleii	a				C. kingsleii	a	0	0		C. kingsleii	a	0	0		C. kingsleii	a	0	0		C. kingsleii	a	0	0		C. kingsleii	a
	j	0	0			j		0			j		0			j					j					j	0	0			j	0	0			j	0	0			j	0	0			j
C. torosa	a	44	14.6667		C. torosa	a	406	55.5404		C. torosa	a	1	5.26316		C. torosa	a				C. torosa	a				C. torosa	a	0	0		C. torosa	a	0	0		C. torosa	a	0	0		C. torosa	a	0	0		C. torosa	a
	j	5	1.66667			j	145	19.8358			j		0			j					j					j	0	0			j	0	0			j	0	0			j	0	0			j
C. fuscata	a	0	0		C. fuscata	a		0		C. fuscata	a		0		C. fuscata	a				C. fuscata	a				C. fuscata	a	0	0		C. fuscata	a	0	0		C. fuscata	a	0	0		C. fuscata	a	0	0		C. fuscata	a
	j	0	0			j		0			j		0			j					j					j	0	0			j	0	0			j	0	0			j	0	0			j
C. vidua	a	3	1		C. vidua	a	1	0.136799		C. vidua	a		0		C. vidua	a				C. vidua	a				C. vidua	a	2	66.6667		C. vidua	a	57	13.9364		C. vidua	a	0	0		C. vidua	a	0	0		C. vidua	a
	j	0	0			j	0	0			j		0			j					j					j	1	33.3333			j	50	12.2249			j	0	0			j	0	0			j
D. stevensoni	a	155	51.6667		D. stevensoni	a		0		D. stevensoni	a		0		D. stevensoni	a				D. stevensoni	a				D. stevensoni	a	0	0		D. stevensoni	a	0	0		D. stevensoni	a	1	0.244499		D. stevensoni	a	3	30		D. stevensoni	a
	j	41	13.6667			j		0			j		0			j					j					j	0	0			j	0	0			j	0	0			j	5	50			j
E. virens	a	0	0		E. virens	a		0		E. virens	a		0		E. virens	a				E. virens	a				E. virens	a	0	0		E. virens	a	0	0		E. virens	a	0	0		E. virens	a	0	0		E. virens	a
	j	0	0			j		0			j		0			j					j					j	0	0			j	0	0			j	0	0			j	0	0			j
F. fabaeformis	a	0	0		F. fabaeformis	a		0		F. fabaeformis	a		0		F. fabaeformis	a				F. fabaeformis	a				F. fabaeformis	a	0	0		F. fabaeformis	a	0	0		F. fabaeformis	a	0	0		F. fabaeformis	a	0	0		F. fabaeformis	a
	j	0	0			j		0			j		0			j					j					j	0	0			j	0	0			j	0	0			j	0	0			j
F. holzkampfi	a	0	0		F. holzkampfi	a		0		F. holzkampfi	a		0		F. holzkampfi	a				F. holzkampfi	a				F. holzkampfi	a	0	0		F. holzkampfi	a	0	0		F. holzkampfi	a	0	0		F. holzkampfi	a	0	0		F. holzkampfi	a
	j	0	0			j		0			j		0			j					j					j	0	0			j	0	0			j	0	0			j	0	0			j
Herpetocypris sp?	a	0	0		Herpetocypris sp?	a		0		Herpetocypris sp?	a		0		Herpetocypris sp?	a				Herpetocypris sp?	a				Herpetocypris sp?	a	0	0		Herpetocypris sp?	a	0	0		Herpetocypris sp?	a	0	0		Herpetocypris sp?	a	0	0		Herpetocypris sp?	a
	j	0	0			j		0			j		0			j					j					j	0	0			j	0	0			j	0	0			j	0	0			j
H. incongruens	a	0	0		H. incongruens	a		0		H. incongruens	a		0		H. incongruens	a				H. incongruens	a				H. incongruens	a	0	0		H. incongruens	a	0	0		H. incongruens	a	0	0		H. incongruens	a	0	0		H. incongruens	a
	j	0	0			j		0			j		0			j					j					j	0	0			j	0	0			j	0	0			j	0	0			j
H. salina	a	0	0		H. salina	a	13	1.77839		H. salina	a	1	5.26316		H. salina	a				H. salina	a				H. salina	a	0	0		H. salina	a	0	0		H. salina	a	0	0		H. salina	a	0	0		H. salina	a
	j	11	3.66667			j	14	1.91518			j	5	26.3158			j					j					j	0	0			j	0	0			j	0	0			j	0	0			j
I. bradyi	a	1	0.333333		I. bradyi	a		0		I. bradyi	a		0		I. bradyi	a				I. bradyi	a				I. bradyi	a	0	0		I. bradyi	a	0	0		I. bradyi	a	0	0		I. bradyi	a	0	0		I. bradyi	a
	j	0	0			j		0			j		0			j					j					j	0	0			j	0	0			j	0	0			j	0	0			j
I. gibba	a	0	0		I. gibba	a		0		I. gibba	a		0		I. gibba	a				I. gibba	a				I. gibba	a	0	0		I. gibba	a	0	0		I. gibba	a	0	0		I. gibba	a	0	0		I. gibba	a
	j	0	0			j		0			j		0			j					j					j	0	0			j	0	0			j	0	0			j	0	0			j
I. monstrifica	a	0	0		I. monstrifica	a		0		I. monstrifica	a		0		I. monstrifica	a				I. monstrifica	a				I. monstrifica	a	0	0		I. monstrifica	a	0	0		I. monstrifica	a	0	0		I. monstrifica	a	0	0		I. monstrifica	a
	j	0	0			j		0			j		0			j					j					j	0	0			j	0	0			j	0	0			j	0	0			j
L. inopinata	a	1	0.333333		L. inopinata	a	120	16.4159		L. inopinata	a		0		L. inopinata	a				L. inopinata	a				L. inopinata	a	0	0		L. inopinata	a	0	0		L. inopinata	a	0	0		L. inopinata	a	0	0		L. inopinata	a
	j	0	0			j	9	1.23119			j		0			j					j					j	0	0			j	0	0			j	0	0			j	0	0			j
N. monacha	a		0		N. monacha	a		0		N. monacha	a		0		N. monacha	a				N. monacha	a				N. monacha	a	0	0		N. monacha	a	0	0		N. monacha	a	0	0		N. monacha	a	0	0		N. monacha	a
	j		0			j		0			j		0			j					j					j	0	0			j	0	0			j	0	0			j	0	0			j
P. kraepelini	a	14	4.66667		P. kraepelini	a		0		P. kraepelini	a		0		P. kraepelini	a				P. kraepelini	a				P. kraepelini	a	0	0		P. kraepelini	a	276	67.4817		P. kraepelini	a	0	0		P. kraepelini	a	0	0		P. kraepelini	a
	j	4	1.33333			j		0			j		0			j					j					j	0	0			j	26	6.35697			j	0	0			j	0	0			j
P. newtoni	a		0		P. newtoni	a		0		P. newtoni	a		0		P. newtoni	a				P. newtoni	a				P. newtoni	a	0	0		P. newtoni	a	0	0		P. newtoni	a	0	0		P. newtoni	a	0	0		P. newtoni	a
	j		0			j		0			j		0			j					j					j	0	0			j	0	0			j	0	0			j	0	0			j
P. arcuata	a	2	0.666667		P. arcuata	a		0		P. arcuata	a		0		P. arcuata	a				P. arcuata	a				P. arcuata	a	0	0		P. arcuata	a	0	0		P. arcuata	a	0	0		P. arcuata	a	0	0		P. arcuata	a
	j	14	4.66667			j		0			j		0			j					j					j	0	0			j	0	0			j	0	0			j	0	0			j
P. smaragdina	a		0		P. smaragdina	a		0		P. smaragdina	a		0		P. smaragdina	a				P. smaragdina	a				P. smaragdina	a	0	0		P. smaragdina	a	0	0		P. smaragdina	a	0	0		P. smaragdina	a	0	0		P. smaragdina	a
	j		0			j		0			j		0			j					j					j	0	0			j	0	0			j	0	0			j	0	0			j
P. zenkeri	a		0		P. zenkeri	a		0		P. zenkeri	a		0		P. zenkeri	a				P. zenkeri	a				P. zenkeri	a	0	0		P. zenkeri	a	0	0		P. zenkeri	a	0	0		P. zenkeri	a	0	0		P. zenkeri	a
	j		0			j		0			j		0			j					j					j	0	0			j	0	0			j	0	0			j	0	0			j
P. compressa	a		0		P. compressa	a		0		P. compressa	a		0		P. compressa	a				P. compressa	a				P. compressa	a	0	0		P. compressa	a	0	0		P. compressa	a	0	0		P. compressa	a	0	0		P. compressa	a
	j		0			j		0			j		0			j					j					j	0	0			j	0	0			j	0	0			j	0	0			j
P. marchica	a		0		P. marchica	a		0		P. marchica	a		0		P. marchica	a				P. marchica	a				P. marchica	a	0	0		P. marchica	a	0	0		P. marchica	a	0	0		P. marchica	a	1	10		P. marchica	a
	j		0			j		0			j		0			j					j					j	0	0			j	0	0			j	0	0			j	1	10			j
S. aculeata	a		0		S. aculeata	a		0		S. aculeata	a	1	5.26316		S. aculeata	a				S. aculeata	a				S. aculeata	a	0	0		S. aculeata	a	0	0		S. aculeata	a	0	0		S. aculeata	a	0	0		S. aculeata	a
	j		0			j		0			j	1	5.26316			j					j					j	0	0			j	0	0			j	0	0			j	0	0			j
total		300					731					19															3					409					1					10
[truncated: 8 more columns]
