# Supplementary material for: Spatio-temporal distribution of ostracod species in saline inland lakes (Mansfeld lake area; Central Germany)
Source: PeerJ. 2022 Aug 9;10:e13668. doi: 10.7717/peerj.13668 (PMC9373980; doi:10.7717/peerj.13668)
Supplement: Supplemental Information 4 — Abbreviations of the water bodies: KS, Kernersee; BS, Bindersee; TE, Teufe; TE2, Teufe2; QW, Quelle im Wald; OT, Ottilienteich; OT2, Ottilienteich2; WL, Wannsleben; TA, Tongrube Alte Schule; ST, Salzatal; SS, Süßer See; MG, Mittelgraben. [file peerj-10-13668-s004.xlsx]

## Sheet: 04.19
KS		valves	carapaces	total	relative taphocoenosis		BS		valves	carapaces	total	rel. taph		TE		valves	carapaces	total	rel. taph		TE2		valves	carapaces	total	rel. taph		QW		valves	carapaces	total	rel. taph		OT		valves	carapaces	total	rel. taph		OT2		valves	carapaces	total	rel. taph		WL
C.candida	adult	27	22	71	3.08026		C.candida	a	4	3	10	0.790514		C.candida	a	3	3	9	0.650289		C.candida	a	0	0	0	0		C.candida	a	0	0	0	0		C.candida	a	1	0	1	0.0684463		C.candida	a	0	0	0	0		C.candida
	juvenile	24	7	38	1.64859			j	21	6	33	2.6087			j	4	0	4	0.289017			j	13	5	23	3.02632			j	0	0	0	0			j	7	0	7	0.479124			j	0	0	0	0
C. neglecta	a	22	7	36	1.56182		C. neglecta	a	14	9	32	2.52964		C. neglecta	a	14	5	24	1.7341		C. neglecta	a	0	0	0	0		C. neglecta	a	0	0	0	0		C. neglecta	a	0	0	0	0		C. neglecta	a	3	0	3	0.526316		C. neglecta
	j	10	1	12	0.520607			j	2	0	2	0.158103			j	7	5	17	1.22832			j	0	0	0	0			j	0	0	0	0			j	0	0	0	0			j	13	2	17	2.98246
C. kingsleii	a	1	0	1	0.0433839		C. kingsleii	a	0	0	0	0		C. kingsleii	a	0	0	0	0		C. kingsleii	a	0	0	0	0		C. kingsleii	a	0	0	0	0		C. kingsleii	a	0	0	0	0		C. kingsleii	a	0	0	0	0		C. kingsleii
	j	0	0	0	0			j	0	0	0	0			j	0	0	0	0			j	0	0	0	0			j	0	0	0	0			j	0	0	0	0			j	0	0	0	0
C. torosa	a	208	303	814	35.3145		C. torosa	a	419	76	571	45.1383		C. torosa	a	107	76	259	18.7139		C. torosa	a	0	0	0	0		C. torosa	a	1	0	1	0.217391		C. torosa	a	0	0	0	0		C. torosa	a	5	1	7	1.22807		C. torosa
	j	250	54	358	15.5315			j	323	34	391	30.9091			j	160	28	216	15.6069			j	3	1	5	0.657895			j	4	2	8	1.73913			j	1	0	1	0.0684463			j	2	1	4	0.701754
C. fuscata	a	3	2	7	0.303688		C. fuscata	a	0	0	0	0		C. fuscata	a	0	3	6	0.433526		C. fuscata	a	0	0	0	0		C. fuscata	a	0	0	0	0		C. fuscata	a	0	0	0	0		C. fuscata	a	0	0	0	0		C. fuscata
	j	0	0	0	0			j	0	0	0	0			j	0	0	0	0			j	0	0	0	0			j	0	0	0	0			j	0	0	0	0			j	0	0	0	0
C. vidua	a	53	182	417	18.0911		C. vidua	a	3	11	25	1.97628		C. vidua	a	0	0	0	0		C. vidua	a	0	0	0	0		C. vidua	a	0	0	0	0		C. vidua	a	44	476	996	68.1725		C. vidua	a	66	13	92	16.1404		C. vidua
	j	49	1	51	2.21258			j	1	0	1	0.0790514			j	0	0	0	0			j	0	0	0	0			j	0	0	0	0			j	185	17	219	14.9897			j	47	3	53	9.29825
D. stevensoni	a	17	5	27	1.17137		D. stevensoni	a	0	0	0	0		D. stevensoni	a	0	0	0	0		D. stevensoni	a	0	0	0	0		D. stevensoni	a	0	0	0	0		D. stevensoni	a	2	2	6	0.410678		D. stevensoni	a	0	0	0	0		D. stevensoni
	j	6	0	6	0.260304			j	0	0	0	0			j	0	3	6	0.433526			j	0	0	0	0			j	0	0	0	0			j	0	0	0	0			j	0	0	0	0
E. virens	a	0	0	0	0		E. virens	a	0	0	0	0		E. virens	a	0	0	0	0		E. virens	a	0	0	0	0		E. virens	a	0	1	2	0.434783		E. virens	a	0	0	0	0		E. virens	a	2	0	2	0.350877		E. virens
	j	0	0	0	0			j	0	0	0	0			j	0	0	0	0			j	0	0	0	0			j	0	0	0	0			j	0	0	0	0			j	0	0	0	0
F. fabaeformis	a	0	0	0	0		F. fabaeformis	a	0	0	0	0		F. fabaeformis	a	0	0	0	0		F. fabaeformis	a	0	0	0	0		F. fabaeformis	a	0	0	0	0		F. fabaeformis	a	0	0	0	0		F. fabaeformis	a	33	0	33	5.78947		F. fabaeformis
	j	0	0	0	0			j	1	0	1	0.0790514			j	0	0	0	0			j	0	0	0	0			j	0	0	0	0			j	0	0	0	0			j	21	0	21	3.68421
F. holzkampfi	a	6	0	6	0.260304		F. holzkampfi	a	0	0	0	0		F. holzkampfi	a	0	0	0	0		F. holzkampfi	a	0	0	0	0		F. holzkampfi	a	0	0	0	0		F. holzkampfi	a	0	0	0	0		F. holzkampfi	a	0	0	0	0		F. holzkampfi
	j	5	0	5	0.21692			j	0	0	0	0			j	0	0	0	0			j	0	0	0	0			j	0	0	0	0			j	0	0	0	0			j	0	0	0	0
Herpetocypris sp?	a	0	0	0	0		Herpetocypris sp?	a	0	0	0	0		Herpetocypris sp?	a	0	0	0	0		Herpetocypris sp?	a	0	0	0	0		Herpetocypris sp?	a	0	0	0	0		Herpetocypris sp?	a	0	0	0	0		Herpetocypris sp?	a	0	0	0	0		Herpetocypris sp?
	j	0	0	0	0			j	1	0	1	0.0790514			j	0	0	0	0			j	0	0	0	0			j	0	0	0	0			j	0	0	0	0			j	0	0	0	0
H. incongruens	a	0	0	0	0		H. incongruens	a	0	0	0	0		H. incongruens	a	0	0	0	0		H. incongruens	a	0	0	0	0		H. incongruens	a	0	2	4	0.869565		H. incongruens	a	0	0	0	0		H. incongruens	a	0	0	0	0		H. incongruens
	j	0	0	0	0			j	0	0	0	0			j	0	0	0	0			j	0	0	0	0			j	0	0	0	0			j	0	0	0	0			j	0	0	0	0
H. salina	a	5	0	5	0.21692		H. salina	a	24	16	56	4.42688		H. salina	a	26	16	58	4.19075		H. salina	a	2	8	18	2.36842		H. salina	a	49	28	105	22.8261		H. salina	a	0	0	0	0		H. salina	a	5	2	9	1.57895		H. salina
	j	3	0	3	0.130152			j	29	1	31	2.45059			j	97	22	141	10.1879			j	4	1	6	0.789474			j	76	36	148	32.1739			j	0	0	0	0			j	3	0	3	0.526316
I. bradyi	a	23	12	47	2.03905		I. bradyi	a	40	6	52	4.11067		I. bradyi	a	4	5	14	1.01156		I. bradyi	a	0	0	0	0		I. bradyi	a	0	0	0	0		I. bradyi	a	1	0	1	0.0684463		I. bradyi	a	1	0	1	0.175439		I. bradyi
	j	6	0	6	0.260304			j	10	4	18	1.42292			j	4	1	6	0.433526			j	0	0	0	0			j	0	0	0	0			j	0	0	0	0			j	4	0	4	0.701754
I. gibba	a	0	0	0	0		I. gibba	a	0	0	0	0		I. gibba	a	0	0	0	0		I. gibba	a	4	8	20	2.63158		I. gibba	a	46	54	154	33.4783		I. gibba	a	0	0	0	0		I. gibba	a	0	0	0	0		I. gibba
	j	0	0	0	0			j	0	0	0	0			j	0	0	0	0			j	4	1	6	0.789474			j	34	2	38	8.26087			j	0	0	0	0			j	0	0	0	0
I. monstrifica	a	23	12	47	2.03905		I. monstrifica	a	0	0	0	0		I. monstrifica	a	0	0	0	0		I. monstrifica	a	0	0	0	0		I. monstrifica	a	0	0	0	0		I. monstrifica	a	0	0	0	0		I. monstrifica	a	0	0	0	0		I. monstrifica
	j	17	0	17	0.737527			j	0	0	0	0			j	0	0	0	0			j	0	0	0	0			j	0	0	0	0			j	0	0	0	0			j	0	0	0	0
L. inopinata	a	4	17	38	1.64859		L. inopinata	a	1	4	9	0.711462		L. inopinata	a	0	1	2	0.144509		L. inopinata	a	2	38	78	10.2632		L. inopinata	a	0	0	0	0		L. inopinata	a	0	0	0	0		L. inopinata	a	0	0	0	0		L. inopinata
	j	1	0	1	0.0433839			j	0	0	0	0			j	0	0	0	0			j	0	0	0	0			j	0	0	0	0			j	0	0	0	0			j	0	0	0	0
N. monacha	a	0	0	0	0		N. monacha	a	0	0	0	0		N. monacha	a	0	0	0	0		N. monacha	a	0	0	0	0		N. monacha	a	0	0	0	0		N. monacha	a	0	0	0	0		N. monacha	a	4	0	4	0.701754		N. monacha
	j	0	0	0	0			j	0	0	0	0			j	0	0	0	0			j	0	0	0	0			j	0	0	0	0			j	0	0	0	0			j	5	0	5	0.877193
P. kraepelini	a	14	36	86	3.73102		P. kraepelini	a	0	0	0	0		P. kraepelini	a	0	0	0	0		P. kraepelini	a	1	9	19	2.5		P. kraepelini	a	0	0	0	0		P. kraepelini	a	27	71	169	11.5674		P. kraepelini	a	155	58	271	47.5439		P. kraepelini
	j	0	0	0	0			j	0	0	0	0			j	0	0	0	0			j	5	18	41	5.39474			j	0	0	0	0			j	18	11	40	2.73785			j	18	5	28	4.91228
P. newtoni	a	0	0	0	0		P. newtoni	a	0	0	0	0		P. newtoni	a	0	0	0	0		P. newtoni	a	0	0	0	0		P. newtoni	a	0	0	0	0		P. newtoni	a	0	0	0	0		P. newtoni	a	0	0	0	0		P. newtoni
	j	0	0	0	0			j	1	1	3	0.237154			j	0	0	0	0			j	0	0	0	0			j	0	0	0	0			j	0	0	0	0			j	0	0	0	0
P. arcuata	a	2	56	114	4.94577		P. arcuata	a	0	0	0	0		P. arcuata	a	0	7	14	1.01156		P. arcuata	a	1	3	7	0.921053		P. arcuata	a	0	0	0	0		P. arcuata	a	0	0	0	0		P. arcuata	a	0	0	0	0		P. arcuata
	j	1	0	1	0.0433839			j	0	0	0	0			j	0	0	0	0			j	0	5	10	1.31579			j	0	0	0	0			j	0	0	0	0			j	0	0	0	0
P. smaragdina	a	6	2	10	0.433839		P. smaragdina	a	0	0	0	0		P. smaragdina	a	0	0	0	0		P. smaragdina	a	2	14	30	3.94737		P. smaragdina	a	0	0	0	0		P. smaragdina	a	0	8	16	1.09514		P. smaragdina	a	0	0	0	0		P. smaragdina
	j	3	0	3	0.130152			j	0	0	0	0			j	0	0	0	0			j	1	2	5	0.657895			j	0	0	0	0			j	1	2	5	0.342231			j	0	0	0	0
P. zenkeri	a	0	0	0	0		P. zenkeri	a	1	0	1	0.0790514		P. zenkeri	a	0	0	0	0		P. zenkeri	a	0	0	0	0		P. zenkeri	a	0	0	0	0		P. zenkeri	a	0	0	0	0		P. zenkeri	a	1	0	1	0.175439		P. zenkeri
	j	0	0	0	0			j	0	0	0	0			j	0	0	0	0			j	0	0	0	0			j	0	0	0	0			j	0	0	0	0			j	2	0	2	0.350877
P. compressa	a	11	16	43	1.86551		P. compressa	a	2	13	28	2.21344		P. compressa	a	0	4	8	0.578035		P. compressa	a	0	0	0	0		P. compressa	a	0	0	0	0		P. compressa	a	0	0	0	0		P. compressa	a	0	0	0	0		P. compressa
	j	12	1	14	0.607375			j	0	0	0	0			j	3	1	5	0.361272			j	0	0	0	0			j	0	0	0	0			j	0	0	0	0			j	0	0	0	0
P. marchica	a	0	0	0	0		P. marchica	a	0	0	0	0		P. marchica	a	0	0	0	0		P. marchica	a	0	0	0	0		P. marchica	a	0	0	0	0		P. marchica	a	0	0	0	0		P. marchica	a	0	1	2	0.350877		P. marchica
	j	0	0	0	0			j	0	0	0	0			j	0	0	0	0			j	0	0	0	0			j	0	0	0	0			j	0	0	0	0			j	3	2	7	1.22807
S. aculeata	a	5	8	21	0.911063		S. aculeata	a	0	0	0	0		S. aculeata	a	115	240	595	42.9913		S. aculeata	a	64	214	492	64.7368		S. aculeata	a	0	0	0	0		S. aculeata	a	0	0	0	0		S. aculeata	a	1	0	1	0.175439		S. aculeata
	j	2	0	2	0.0867679			j	0	0	0	0			j	15	7	29	2.09538			j	0	0	0	0			j	0		0	0			j	0	0	0	0			j	1	0	1	0.175439
total				2305							1265							1384							760							460							1461							570
[truncated: 17 more columns]

## Sheet: 06.19
KS		valves	carapaces	total	relative taphocoenosis		BS		valves	carapaces	total	rel. taph		TE		valves	carapaces	total	rel. taph		TE2		valves	carapaces	total	rel. taph		QW		valves	carapaces	total	rel. taph		OT		valves	carapaces	total	rel. taph		OT2		valves	carapaces	total	rel. taph		WL
C.candida	a	7	6	19	0.890347		C.candida	a	1	2	5	0.552486		C.candida	a	5	12	29	1.73861		C.candida	a	0	0	0	0		C.candida	a	0	0	0	0		C.candida	a	7	11	29	1.99725		C.candida	a	20	7	34	3.11641		C.candida
	j	21	2	25	1.17151			j	31	3	37	4.0884			j	0	0	0	0			j	4	2	8	1.53257			j	0	0	0	0			j	5	4	13	0.895317			j	39	6	51	4.67461
C. neglecta	a	5	4	13	0.609185		C. neglecta	a	4	4	12	1.32597		C. neglecta	a	111	92	295	17.6859		C. neglecta	a	0	0	0	0		C. neglecta	a	0	0	0	0		C. neglecta	a	0	0	0	0		C. neglecta	a	0	0	0	0		C. neglecta
	j	0	6	12	0.562324			j	2	0	2	0.220994			j	24	0	24	1.43885			j	0	0	0	0			j	0	0	0	0			j	0	0	0	0			j	0	0	0	0
C. kingsleii	a	0	0	0	0		C. kingsleii	a	0	0	0	0		C. kingsleii	a	0	0	0	0		C. kingsleii	a	0	0	0	0		C. kingsleii	a	0	0	0	0		C. kingsleii	a	0	0	0	0		C. kingsleii	a	0	0	0	0		C. kingsleii
	j	0	0	0	0			j	0	0	0	0			j	0	0	0	0			j	0	0	0	0			j	0	0	0	0			j	0	0	0	0			j	0	0	0	0
C. torosa	a	253	413	1079	50.5623		C. torosa	a	113	61	235	25.9669		C. torosa	a	54	112	278	16.6667		C. torosa	a	0	0	0	0		C. torosa	a	1	0	1	0.387597		C. torosa	a	0	0	0	0		C. torosa	a	5	11	27	2.47479		C. torosa
	j	96	40	176	8.24742			j	171	6	183	20.221			j	12	4	20	1.19904			j	0	0	0	0			j	1	0	1	0.387597			j	0	0	0	0			j	5	1	7	0.641613
C. fuscata	a	4	6	16	0.749766		C. fuscata	a	0	0	0	0		C. fuscata	a	0	0	0	0		C. fuscata	a	0	0	0	0		C. fuscata	a	0	0	0	0		C. fuscata	a	0	0	0	0		C. fuscata	a	0	0	0	0		C. fuscata
	j	0	0	0	0			j	0	0	0	0			j	0	0	0	0			j	0	0	0	0			j	0	0	0	0			j	0	0	0	0			j	0	0	0	0
C. vidua	a	53	48	149	6.98219		C. vidua	a	1	5	11	1.21547		C. vidua	a	0	0	0	0		C. vidua	a	0	0	0	0		C. vidua	a	0	0	0	0		C. vidua	a	117	219	555	38.2231		C. vidua	a	89	45	179	16.407		C. vidua
	j	71	1	73	3.42081			j	1	0	1	0.110497			j	0	0	0	0			j	0	0	0	0			j	0	0	0	0			j	335	87	509	35.0551			j	144	29	202	18.5151
D. stevensoni	a	8	2	12	0.562324		D. stevensoni	a	0	0	0	0		D. stevensoni	a	0	0	0	0		D. stevensoni	a	0	0	0	0		D. stevensoni	a	0	0	0	0		D. stevensoni	a	3	1	5	0.344353		D. stevensoni	a	0	0	0	0		D. stevensoni
	j	2	0	2	0.0937207			j	3	1	5	0.552486			j	2	1	4	0.239808			j	0	0	0	0			j	0	0	0	0			j	0	0	0	0			j	0	0	0	0
E. virens	a	0	0	0	0		E. virens	a	0	0	0	0		E. virens	a	0	0	0	0		E. virens	a	0	0	0	0		E. virens	a	1	0	1	0.387597		E. virens	a	0	0	0	0		E. virens	a	1	0	1	0.091659		E. virens
	j	0	0	0	0			j	0	0	0	0			j	0	0	0	0			j	0	0	0	0			j	0	0	0	0			j	0	0	0	0			j	2	0	2	0.183318
F. fabaeformis	a	0	0	0	0		F. fabaeformis	a	1	0	1	0.110497		F. fabaeformis	a	0	0	0	0		F. fabaeformis	a	0	0	0	0		F. fabaeformis	a	0	0	0	0		F. fabaeformis	a	0	0	0	0		F. fabaeformis	a	22	2	26	2.38313		F. fabaeformis
	j	0	0	0	0			j	1	1	3	0.331492			j	0	0	0	0			j	0	0	0	0			j	0	0	0	0			j	0	0	0	0			j	43	2	47	4.30797
F. holzkampfi	a	17	2	21	0.984067		F. holzkampfi	a	0	0	0	0		F. holzkampfi	a	0	0	0	0		F. holzkampfi	a	0	0	0	0		F. holzkampfi	a	0	0	0	0		F. holzkampfi	a	0	0	0	0		F. holzkampfi	a	0	0	0	0		F. holzkampfi
	j	25	0	25	1.17151			j	0	0	0	0			j	0	0	0	0			j	0	0	0	0			j	0	0	0	0			j	0	0	0	0			j	0	0	0	0
Herpetocypris sp?	a	0	0	0	0		Herpetocypris sp?	a	0	0	0	0		Herpetocypris sp?	a	0	0	0	0		Herpetocypris sp?	a	0	0	0	0		Herpetocypris sp?	a	0	0	0	0		Herpetocypris sp?	a	0	0	0	0		Herpetocypris sp?	a	0	0	0	0		Herpetocypris sp?
	j	0	0	0	0			j	0	0	0	0			j	1	0	1	0.059952			j	0	0	0	0			j	0	0	0	0			j	0	0	0	0			j	0	0	0	0
H. incongruens	a	0	0	0	0		H. incongruens	a	0	0	0	0		H. incongruens	a	0	0	0	0		H. incongruens	a	0	0	0	0		H. incongruens	a	5	0	5	1.93798		H. incongruens	a	0	0	0	0		H. incongruens	a	0	0	0	0		H. incongruens
	j	0	0	0	0			j	0	0	0	0			j	0	0	0	0			j	0	0	0	0			j	31	0	31	12.0155			j	0	0	0	0			j	0	0	0	0
H. salina	a	5	0	5	0.234302		H. salina	a	6	1	8	0.883978		H. salina	a	133	69	271	16.247		H. salina	a	0	0	0	0		H. salina	a	11	8	27	10.4651		H. salina	a	0	0	0	0		H. salina	a	4	0	4	0.366636		H. salina
	j	6	1	8	0.374883			j	35	3	41	4.53039			j	247	102	451	27.0384			j	257	9	275	52.682			j	81	7	95	36.8217			j	0	0	0	0			j	4	0	4	0.366636
I. bradyi	a	5	1	7	0.328022		I. bradyi	a	5	0	5	0.552486		I. bradyi	a	4	0	4	0.239808		I. bradyi	a	0	0	0	0		I. bradyi	a	0	0	0	0		I. bradyi	a	0	0	0	0		I. bradyi	a	1	0	1	0.091659		I. bradyi
	j	4	0	4	0.187441			j	5	0	5	0.552486			j	7	1	9	0.539568			j	0	0	0	0			j	0	0	0	0			j	1	0	1	0.0688705			j	3	0	3	0.274977
I. gibba	a	0	0	0	0		I. gibba	a	0	0	0	0		I. gibba	a	0	0	0	0		I. gibba	a	0	0	0	0		I. gibba	a	11	1	13	5.03876		I. gibba	a	0	0	0	0		I. gibba	a	0	0	0	0		I. gibba
	j	0	0	0	0			j	0	0	0	0			j	0	0	0	0			j	61	0	61	11.6858			j	80	2	84	32.5581			j	0	0	0	0			j	0	0	0	0
I. monstrifica	a	17	5	27	1.26523		I. monstrifica	a	0	0	0	0		I. monstrifica	a	0	0	0	0		I. monstrifica	a	0	0	0	0		I. monstrifica	a	0	0	0	0		I. monstrifica	a	0	0	0	0		I. monstrifica	a	0	0	0	0		I. monstrifica
	j	51	2	55	2.57732			j	0	0	0	0			j	0	0	0	0			j	0	0	0	0			j	0	0	0	0			j	0	0	0	0			j	0	0	0	0
L. inopinata	a	15	33	81	3.79569		L. inopinata	a	46	119	284	31.3812		L. inopinata	a	2	3	8	0.479616		L. inopinata	a	0	0	0	0		L. inopinata	a	0	0	0	0		L. inopinata	a	0	1	2	0.137741		L. inopinata	a	2	0	2	0.183318		L. inopinata
	j	9	6	21	0.984067			j	31	0	31	3.42541			j	4	0	4	0.239808			j	0	0	0	0			j	0	0	0	0			j	0	0	0	0			j	1	0	1	0.091659
N. monacha	a	0	0	0	0		N. monacha	a	0	0	0	0		N. monacha	a	0	0	0	0		N. monacha	a	0	0	0	0		N. monacha	a	0	0	0	0		N. monacha	a	0	2	4	0.275482		N. monacha	a	1	0	1	0.091659		N. monacha
	j	0	0	0	0			j	0	0	0	0			j	0	0	0	0			j	0	0	0	0			j	0	0	0	0			j	5	0	5	0.344353			j	1	0	1	0.091659
P. kraepelini	a	28	22	72	3.37395		P. kraepelini	a	3	6	15	1.65746		P. kraepelini	a	0	0	0	0		P. kraepelini	a	0	2	4	0.766284		P. kraepelini	a	0	0	0	0		P. kraepelini	a	50	68	186	12.8099		P. kraepelini	a	113	113	339	31.0724		P. kraepelini
	j	0	0	0	0			j	0	0	0	0			j	0	0	0	0			j	2	0	2	0.383142			j	0	0	0	0			j	80	5	90	6.19835			j	68	31	130	11.9157
P. newtoni	a	0	0	0	0		P. newtoni	a	0	0	0	0		P. newtoni	a	0	0	0	0		P. newtoni	a	0	0	0	0		P. newtoni	a	0	0	0	0		P. newtoni	a	0	0	0	0		P. newtoni	a	0	0	0	0		P. newtoni
	j	0	0	0	0			j	0	0	0	0			j	2	2	6	0.359712			j	0	0	0	0			j	0	0	0	0			j	0	0	0	0			j	0	0	0	0
P. arcuata	a	10	50	110	5.15464		P. arcuata	a	1	1	3	0.331492		P. arcuata	a	5	1	7	0.419664		P. arcuata	a	0	0	0	0		P. arcuata	a	0	0	0	0		P. arcuata	a	0	0	0	0		P. arcuata	a	1	1	3	0.274977		P. arcuata
	j	0	0	0	0			j	0	1	2	0.220994			j	0	0	0	0			j	0	0	0	0			j	0	0	0	0			j	0	0	0	0			j	0	0	0	0
P. smaragdina	a	16	4	24	1.12465		P. smaragdina	a	2	0	2	0.220994		P. smaragdina	a	2	1	4	0.239808		P. smaragdina	a	0	0	0	0		P. smaragdina	a	0	0	0	0		P. smaragdina	a	4	10	24	1.65289		P. smaragdina	a	1	2	5	0.458295		P. smaragdina
	j	27	16	59	2.76476			j	1	0	1	0.110497			j	0	0	0	0			j	37	3	43	8.23755			j	0	0	0	0			j	19	5	29	1.99725			j	4	1	6	0.549954
P. zenkeri	a	0	0	0	0		P. zenkeri	a	0	0	0	0		P. zenkeri	a	7	1	9	0.539568		P. zenkeri	a	0	0	0	0		P. zenkeri	a	0	0	0	0		P. zenkeri	a	0	0	0	0		P. zenkeri	a	1	0	1	0.091659		P. zenkeri
	j	0	0	0	0			j	0	0	0	0			j	16	2	20	1.19904			j	0	0	0	0			j	0	0	0	0			j	0	0	0	0			j	1	0	1	0.091659
P. compressa	a	3	3	9	0.421743		P. compressa	a	1	1	3	0.331492		P. compressa	a	0	0	0	0		P. compressa	a	0	0	0	0		P. compressa	a	0	0	0	0		P. compressa	a	0	0	0	0		P. compressa	a	0	0	0	0		P. compressa
	j	6	2	10	0.468604			j	1	0	1	0.110497			j	0	0	0	0			j	0	0	0	0			j	0	0	0	0			j	0	0	0	0			j	0	0	0	0
P. marchica	a	0	0	0	0		P. marchica	a	0	0	0	0		P. marchica	a	0	0	0	0		P. marchica	a	0	0	0	0		P. marchica	a	0	0	0	0		P. marchica	a	0	0	0	0		P. marchica	a	0	3	6	0.549954		P. marchica
	j	0	0	0	0			j	0	0	0	0			j	0	0	0	0			j	0	0	0	0			j	0	0	0	0			j	0	0	0	0			j	4	0	4	0.366636
S. aculeata	a	10	4	18	0.843486		S. aculeata	a	5	1	7	0.773481		S. aculeata	a	185	10	205	12.2902		S. aculeata	a	27	14	55	10.5364		S. aculeata	a	0	0	0	0		S. aculeata	a	0	0	0	0		S. aculeata	a	3	0	3	0.274977		S. aculeata
	j	2	0	2	0.0937207			j	2	0	2	0.220994			j	19	0	19	1.13909			j	64	5	74	14.1762			j	0	0	0	0			j	0	0	0	0			j	0	0	0	0
total				2134							905							1668							522							258							1452							1091
[truncated: 23 more columns]

## Sheet: 09.19
KS		valves	carapaces	total	relative taphocoenosis		BS		valves	carapaces	total	rel. taph		TE		valves	carapaces	total	rel. taph		TE2		valves	carapaces	total	rel. taph		QW		valves	carapaces	total	rel. taph		OT		valves	carapaces	total	rel. taph		OT2		valves	carapaces	total	rel. taph		WL
																							no sample
C.candida	a	15	5	25	0.89222		C.candida	a	0	0	0	0		C.candida	a	0	1	2	0.155159		C.candida	a						C.candida	a	0	0	0	0		C.candida	a	0	0	0	0		C.candida	a	4	0	4	1.86916		C.candida
	j	6	1	8	0.28551			j	4	0	4	2.77778			j	0	0	0	0			j							j	0	0	0	0			j	2	0	2	0.3367			j	0	0	0	0
C. neglecta	a	7	3	13	0.463954		C. neglecta	a	0	0	0	0		C. neglecta	a	5	1	7	0.543057		C. neglecta	a						C. neglecta	a	0	0	0	0		C. neglecta	a	0	0	0	0		C. neglecta	a	0	0	0	0		C. neglecta
	j	4	1	6	0.214133			j	0	0	0	0			j	6	1	8	0.620636			j							j	0	0	0	0			j	0	0	0	0			j	0	0	0	0
C. kingsleii	a	0	0	0	0		C. kingsleii	a	0	0	0	0		C. kingsleii	a	0	0	0	0		C. kingsleii	a						C. kingsleii	a	0	0	0	0		C. kingsleii	a	0	0	0	0		C. kingsleii	a	0	0	0	0		C. kingsleii
	j	0	0	0	0			j	0	0	0	0			j	0	0	0	0			j							j	0	0	0	0			j	0	0	0	0			j	0	0	0	0
C. torosa	a	554	231	1016	36.2598		C. torosa	a	15	4	23	15.9722		C. torosa	a	1	0	1	0.0775795		C. torosa	a						C. torosa	a	0	0	0	0		C. torosa	a	0	0	0	0		C. torosa	a	1	1	3	1.40187		C. torosa
	j	157	48	253	9.02926			j	51	5	61	42.3611			j	19	2	23	1.78433			j							j	0	0	0	0			j	0	0	0	0			j	0	0	0	0
C. fuscata	a	11	5	21	0.749465		C. fuscata	a	0	0	0	0		C. fuscata	a	0	0	0	0		C. fuscata	a						C. fuscata	a	0	0	0	0		C. fuscata	a	0	0	0	0		C. fuscata	a	0	0	0	0		C. fuscata
	j	0	0	0	0			j	0	0	0	0			j	0	0	0	0			j							j	0	0	0	0			j	0	0	0	0			j	0	0	0	0
C. vidua	a	320	148	616	21.9843		C. vidua	a	0	0	0	0		C. vidua	a	0	0	0	0		C. vidua	a						C. vidua	a	0	0	0	0		C. vidua	a	36	154	344	57.9125		C. vidua	a	0	0	0	0		C. vidua
	j	25	10	45	1.606			j	0	0	0	0			j	0	0	0	0			j							j	0	0	0	0			j	40	36	112	18.8552			j	0	0	0	0
D. stevensoni	a	17	6	29	1.03498		D. stevensoni	a	0	0	0	0		D. stevensoni	a	0	0	0	0		D. stevensoni	a						D. stevensoni	a	0	0	0	0		D. stevensoni	a	0	0	0	0		D. stevensoni	a	0	0	0	0		D. stevensoni
	j	9	3	15	0.535332			j	0	0	0	0			j	0	0	0	0			j							j	0	0	0	0			j	0	0	0	0			j	0	0	0	0
E. virens	a	0	0	0	0		E. virens	a	0	0	0	0		E. virens	a	0	0	0	0		E. virens	a						E. virens	a	0	0	0	0		E. virens	a	0	0	0	0		E. virens	a	0	0	0	0		E. virens
	j	0	0	0	0			j	0	0	0	0			j	0	0	0	0			j							j	0	0	0	0			j	0	0	0	0			j	0	0	0	0
F. fabaeformis	a	0	0	0	0		F. fabaeformis	a	0	0	0	0		F. fabaeformis	a	0	0	0	0		F. fabaeformis	a						F. fabaeformis	a	0	0	0	0		F. fabaeformis	a	0	0	0	0		F. fabaeformis	a	0	0	0	0		F. fabaeformis
	j	0	0	0	0			j	0	0	0	0			j	0	0	0	0			j							j	0	0	0	0			j	0	0	0	0			j	0	0	0	0
F. holzkampfi	a	2	1	4	0.142755		F. holzkampfi	a	0	0	0	0		F. holzkampfi	a	0	0	0	0		F. holzkampfi	a						F. holzkampfi	a	0	0	0	0		F. holzkampfi	a	0	0	0	0		F. holzkampfi	a	0	0	0	0		F. holzkampfi
	j	0	0	0	0			j	0	0	0	0			j	0	0	0	0			j							j	0	0	0	0			j	0	0	0	0			j	0	0	0	0
Herpetocypris sp?	a	0	0	0	0		Herpetocypris sp?	a	0	0	0	0		Herpetocypris sp?	a	0	0	0	0		Herpetocypris sp?	a						Herpetocypris sp?	a	0	0	0	0		Herpetocypris sp?	a	0	0	0	0		Herpetocypris sp?	a	0	0	0	0		Herpetocypris sp?
	j	0	0	0	0			j	0	0	0	0			j	0	0	0	0			j							j	0	0	0	0			j	0	0	0	0			j	0	0	0	0
H. incongruens	a	0	0	0	0		H. incongruens	a	0	0	0	0		H. incongruens	a	0	0	0	0		H. incongruens	a						H. incongruens	a	0	0	0	0		H. incongruens	a	0	0	0	0		H. incongruens	a	0	0	0	0		H. incongruens
	j	0	0	0	0			j	0	0	0	0			j	0	0	0	0			j							j	0	0	0	0			j	0	0	0	0			j	0	0	0	0
H. salina	a	3	1	5	0.178444		H. salina	a	2	1	4	2.77778		H. salina	a	29	12	53	4.11171		H. salina	a						H. salina	a	5	1	7	2.23642		H. salina	a	0	0	0	0		H. salina	a	1	0	1	0.46729		H. salina
	j	0	0	0	0			j	3	0	3	2.08333			j	180	23	226	17.533			j							j	81	52	185	59.1054			j	2	0	2	0.3367			j	2	0	2	0.934579
I. bradyi	a	11	5	21	0.749465		I. bradyi	a	2	0	2	1.38889		I. bradyi	a	6	1	8	0.620636		I. bradyi	a						I. bradyi	a	0	0	0	0		I. bradyi	a	0	0	0	0		I. bradyi	a	0	0	0	0		I. bradyi
	j	6	0	6	0.214133			j	0	0	0	0			j	0	0	0	0			j							j	0	0	0	0			j	0	0	0	0			j	0	0	0	0
I. gibba	a	0	0	0	0		I. gibba	a	0	0	0	0		I. gibba	a	0	0	0	0		I. gibba	a						I. gibba	a	16	40	96	30.6709		I. gibba	a	0	0	0	0		I. gibba	a	0	0	0	0		I. gibba
	j	0	0	0	0			j	0	0	0	0			j	0	0	0	0			j							j	21	2	25	7.98722			j	0	0	0	0			j	0	0	0	0
I. monstrifica	a	10	3	16	0.571021		I. monstrifica	a	0	0	0	0		I. monstrifica	a	0	0	0	0		I. monstrifica	a						I. monstrifica	a	0	0	0	0		I. monstrifica	a	0	0	0	0		I. monstrifica	a	0	0	0	0		I. monstrifica
	j	9	2	13	0.463954			j	0	0	0	0			j	0	0	0	0			j							j	0	0	0	0			j	0	0	0	0			j	0	0	0	0
L. inopinata	a	34	14	62	2.21271		L. inopinata	a	15	7	29	20.1389		L. inopinata	a	0	0	0	0		L. inopinata	a						L. inopinata	a	0	0	0	0		L. inopinata	a	0	0	0	0		L. inopinata	a	0	0	0	0		L. inopinata
	j	0	0	0	0			j	5	2	9	6.25			j	0	0	0	0			j							j	0	0	0	0			j	0	0	0	0			j	0	0	0	0
N. monacha	a	0	0	0	0		N. monacha	a	0	0	0	0		N. monacha	a	0	0	0	0		N. monacha	a						N. monacha	a	0	0	0	0		N. monacha	a	0	0	0	0		N. monacha	a	0	0	0	0		N. monacha
	j	0	0	0	0			j	1	0	1	0.694444			j	0	0	0	0			j							j	0	0	0	0			j	0	0	0	0			j	1	0	1	0.46729
P. kraepelini	a	64	29	122	4.35403		P. kraepelini	a	0	0	0	0		P. kraepelini	a	0	0	0	0		P. kraepelini	a						P. kraepelini	a	0	0	0	0		P. kraepelini	a	10	50	110	18.5185		P. kraepelini	a	12	44	100	46.729		P. kraepelini
	j	16	6	28	0.999286			j	0	0	0	0			j	0	0	0	0			j							j	0	0	0	0			j	6	8	22	3.7037			j	7	11	29	13.5514
P. newtoni	a	0	0	0	0		P. newtoni	a	0	0	0	0		P. newtoni	a	0	0	0	0		P. newtoni	a						P. newtoni	a	0	0	0	0		P. newtoni	a	0		0	0		P. newtoni	a	0	0	0	0		P. newtoni
	j	0	0	0	0			j	0	0	0	0			j	0	0	0	0			j							j	0	0	0	0			j	0		0	0			j	0	0	0	0
P. arcuata	a	61	27	115	4.10421		P. arcuata	a	2	1	4	2.77778		P. arcuata	a	5	2	9	0.698216		P. arcuata	a						P. arcuata	a	0	0	0	0		P. arcuata	a	0	1	2	0.3367		P. arcuata	a	1	1	3	1.40187		P. arcuata
	j	4	2	8	0.28551			j	2	1	4	2.77778			j	1	0	1	0.0775795			j							j	0	0	0	0			j	0	0	0	0			j	0	0	0	0
P. smaragdina	a	62	29	120	4.28266		P. smaragdina	a	0	0	0	0		P. smaragdina	a	0	0	0	0		P. smaragdina	a						P. smaragdina	a	0	0	0	0		P. smaragdina	a	0	0	0	0		P. smaragdina	a	0	0	0	0		P. smaragdina
	j	12	5	22	0.785153			j	0	0	0	0			j	4	0	4	0.310318			j							j	0	0	0	0			j	0	0	0	0			j	0	0	0	0
P. zenkeri	a	0	0	0	0		P. zenkeri	a	0	0	0	0		P. zenkeri	a	0	0	0	0		P. zenkeri	a						P. zenkeri	a	0	0	0	0		P. zenkeri	a	0	0	0	0		P. zenkeri	a	0	0	0	0		P. zenkeri
	j	0	0	0	0			j	0	0	0	0			j	0	0	0	0			j							j	0	0	0	0			j	0	0	0	0			j	0	0	0	0
P. compressa	a	24	11	46	1.64168		P. compressa	a	0	0	0	0		P. compressa	a	0	0	0	0		P. compressa	a						P. compressa	a	0	0	0	0		P. compressa	a	0	0	0	0		P. compressa	a	0	0	0	0		P. compressa
	j	4	1	6	0.214133			j	0	0	0	0			j	0	0	0	0			j							j	0	0	0	0			j	0	0	0	0			j	0	0	0	0
P. marchica	a	0	0	0	0		P. marchica	a	0	0	0	0		P. marchica	a	0	0	0	0		P. marchica	a						P. marchica	a	0	0	0	0		P. marchica	a	0	0	0	0		P. marchica	a	0	0	0	0		P. marchica
	j	0	0	0	0			j	0	0	0	0			j	0	0	0	0			j							j	0	0	0	0			j	0	0	0	0			j	0	0	0	0
S. aculeata	a	78	33	144	5.13919		S. aculeata	a	0	0	0	0		S. aculeata	a	457	190	837	64.9341		S. aculeata	a						S. aculeata	a	0	0	0	0		S. aculeata	a	0	0	0	0		S. aculeata	a	12	25	62	28.972		S. aculeata
	j	11	3	17	0.606709			j	0	0	0	0			j	68	21	110	8.53375			j							j	0	0	0	0			j	0	0	0	0			j	7	1	9	4.20561
total				2802							144							1289														313							594	100						214
[truncated: 26 more columns]
